# Supplementary material for: Impact of EGFR Mutation Detection Methods on the Efficacy of Erlotinib in Patients with Advanced EGFR-Wild Type Lung Adenocarcinoma
Source: PubMed Central journal article supplement (PMC4162576; doi:10.1371/journal.pone.0107160), 2014-09-12
Supplement: pone.0107160.s001.pdf [file pone.0107160.s001.pdf]

Table S1. *EGFR* mutations detected by PNA-LNA PCR clamp and MALDI-TOF MS

| Exon                     | Mutation types (nucleic acid sequence)                                                                                                                                                                                                                                                                                                                                                                                                                                                                                                                                                                                                      |
|--------------------------|---------------------------------------------------------------------------------------------------------------------------------------------------------------------------------------------------------------------------------------------------------------------------------------------------------------------------------------------------------------------------------------------------------------------------------------------------------------------------------------------------------------------------------------------------------------------------------------------------------------------------------------------|
| <b>PNA-LNA PCR clamp</b> |                                                                                                                                                                                                                                                                                                                                                                                                                                                                                                                                                                                                                                             |
| 18                       | G719A (2156G>C), G719C (2155G>T), G719S (2155G>A)                                                                                                                                                                                                                                                                                                                                                                                                                                                                                                                                                                                           |
| 19                       | Del E746_A750 (2235_2249del15, 2236_2250del15),<br>Del L747_T751 (2239_2253del15),<br>Del L747_P753>S (2240_2257del18, 2239_2259>AGC)                                                                                                                                                                                                                                                                                                                                                                                                                                                                                                       |
| 20                       | T790M (2369C>T)                                                                                                                                                                                                                                                                                                                                                                                                                                                                                                                                                                                                                             |
| 21                       | L858R (2573T>G), L861Q (2582T>A)                                                                                                                                                                                                                                                                                                                                                                                                                                                                                                                                                                                                            |
| <b>MALDI-TOF MS</b>      |                                                                                                                                                                                                                                                                                                                                                                                                                                                                                                                                                                                                                                             |
| 18                       | E709A (2126A>C), E709G (2126A>G), E709V (2126A>T), G719A (2156G>C), G719C (2155G>T), G719N (2156G>A), G719S (2155G>A)                                                                                                                                                                                                                                                                                                                                                                                                                                                                                                                       |
| 19                       | Del E746_A750 (2235_2249del15, 2236_2250del15),<br>Del E746_T751 (2236_2253del18),<br>Del E746_T751>A (2237_2251del15),<br>Del E746-T751>I (2235_2252>AAT),<br>Del E746_S752>A (2237_2254del18),<br>Del E746_S752>D (2238_2255del18),<br>Del E746_S752>V (2237_2255>T),<br>Del L747_E749 (2239_2247del9),<br>Del L747_A750>P (2238_2248>GC, 2239_2248TTAAGAGAAG>C),<br>Del L747_T751 (2239_2253del15, 2240_2254del15),<br>Del L747_T751>P (2239_2251>C),<br>Del L747_T751>Q (2238_2252>GCA),<br>Del L747_T751>S (2240_2251del12),<br>Del L747_S752 (2239_2256del18),<br>Del L747_P753>Q (2239_2258>CA),<br>Del L747_P753>S (2240_2257del18) |
| 20                       | S768I (2303G>T), T790M (2369C>T)                                                                                                                                                                                                                                                                                                                                                                                                                                                                                                                                                                                                            |
| 21                       | L858Q (2573T>A), L858R (2573T>G), L861Q (2582T>A)                                                                                                                                                                                                                                                                                                                                                                                                                                                                                                                                                                                           |

EGFR, epidermal growth factor receptor; PNA-LNA PCR, protein nucleic acid-locked nucleic acid polymerase chain reaction; MALDI-TOF MS, matrix-assisted laser desorption ionization-time of flight mass spectrometry.
