# Supplementary material for: Impact of EGFR Mutation Detection Methods on the Efficacy of Erlotinib in Patients with Advanced EGFR-Wild Type Lung Adenocarcinoma
Source: PubMed Central journal article supplement (PMC4162576; doi:10.1371/journal.pone.0107160), 2014-09-12
Supplement: pone.0107160.s002.pdf [file pone.0107160.s002.pdf]

Table S2. Demographic data of the Group-I patients

| Characteristics                      | N = 261    |
|--------------------------------------|------------|
| Age (years), median (range)          | 62 (25-90) |
| Gender, n (%)                        |            |
| Male                                 | 162 (62.1) |
| Female                               | 99 (37.9)  |
| Smoking status, n (%)                |            |
| Non-smoker                           | 138 (52.9) |
| Former-smoker                        | 56 (21.5)  |
| Current-smoker                       | 67 (25.7)  |
| ECOG PS, n (%)                       |            |
| 0-1                                  | 174 (66.7) |
| 2 or more                            | 87 (33.3)  |
| Stage, n (%)                         |            |
| IIIb                                 | 20 (7.7)   |
| IV                                   | 241 (92.3) |
| Prior chemotherapy, n (%)            |            |
| 0                                    | 34 (13.0)  |
| 1                                    | 133 (51.0) |
| 2                                    | 58 (22.2)  |
| 3 or more                            | 36 (13.8)  |
| <i>EGFR</i> detection methods, n (%) |            |
| Direct sequencing                    | 191 (73.2) |
| PNA-LNA PCR Clamping                 | 42 (16.1)  |
| MALDI-TOF MS                         | 14 (5.4)   |
| ARMS                                 | 14 (5.4)   |

ECOG PS, Eastern Cooperative Oncology Group performance status; EGFR, epidermal growth factor receptor; PNA-LNA, protein nucleic acid-locked nucleic acid; MALDI-TOF MS, matrix-assisted laser desorption ionization-time of flight mass spectrometry; ARMS, Scorpions amplification refractory mutation system.
