# Supplementary material for: Impact of EGFR Mutation Detection Methods on the Efficacy of Erlotinib in Patients with Advanced EGFR-Wild Type Lung Adenocarcinoma
Source: PubMed Central journal article supplement (PMC4162576; doi:10.1371/journal.pone.0107160), 2014-09-12
Supplement: pone.0107160.s003.pdf [file pone.0107160.s003.pdf]

Table S3. Demographic data of the Group-II patients

| Characteristics             | N = 996    |
|-----------------------------|------------|
| Age (years), median (range) | 64 (25-98) |
| Gender, n (%)               |            |
| Male                        | 502 (50.4) |
| Female                      | 494 (49.6) |
| Smoking status, n (%)       |            |
| Non-smoker                  | 664 (66.7) |
| Former-smoker               | 85 (8.5)   |
| Current-smoker              | 236 (23.7) |
| N/A                         | 11 (1.1)   |
| Stage , n (%)               |            |
| I                           | 118 (11.8) |
| II                          | 49 (4.9)   |
| IIIa                        | 78 (7.8)   |
| IIIb                        | 66 (6.6)   |
| IV                          | 685 (68.8) |

N/A, not applicable.
