# Supplementary material for: Impact of EGFR Mutation Detection Methods on the Efficacy of Erlotinib in Patients with Advanced EGFR-Wild Type Lung Adenocarcinoma
Source: PubMed Central journal article supplement (PMC4162576; doi:10.1371/journal.pone.0107160), 2014-09-12
Supplement: pone.0107160.s004.pdf [file pone.0107160.s004.pdf]

Table S4. *EGFR* mutation spectrum, detectability and responses to EGFR-TKIs treatment of an independent direct sequencing cohort

| Mutation type       | Exon   | Pt No. | Detectability of MtS methods* |      |       | DC by EGFR-TKIs**   |                    |
|---------------------|--------|--------|-------------------------------|------|-------|---------------------|--------------------|
|                     |        |        | MS                            | ARMS | Cobas | DIRECT <sup>a</sup> | TH/CH <sup>b</sup> |
| Del E709_T710       | 18     | 1      |                               |      |       |                     |                    |
| E709A               | 18     | 1      | ●                             |      |       | △                   |                    |
| E709K               | 18     | 1      |                               |      |       | △                   |                    |
| E709V               | 18     | 1      | ●                             |      |       |                     | ▲                  |
| E711_F712>N         | 18     | 1      |                               |      |       |                     |                    |
| G719A               | 18     | 4      | ●                             | ●    | ●     | ▲                   | ▲                  |
| G719C               | 18     | 1      | ●                             | ●    | ●     | ▲                   | ▲                  |
| G719S               | 18     | 2      | ●                             | ●    | ●     | ▲                   | ▲                  |
| E709K/G719A         | 18     | 1      | ○                             | ○    | ○     | ▲                   |                    |
| E709V/G719A         | 18     | 1      | ●                             | ○    | ○     | △                   |                    |
| E709A/G719S         | 18     | 2      | ●                             | ○    | ○     | △                   | ▲                  |
| G719A/L747S         | 18, 19 | 1      | ○                             | ○    | ○     | △                   |                    |
| G719A/R776H         | 18, 20 | 1      | ○                             | ○    | ○     | △                   | ▲                  |
| G719A/T790M         | 18, 20 | 1      | ●                             | ●    | ●     | △                   |                    |
| G719C/S768I         | 18, 20 | 1      | ●                             | ●    | ●     | ▲                   | ▲                  |
| G719S/S768I         | 18, 20 | 2      | ●                             | ●    | ●     | △                   |                    |
| V689L/L858R         | 18, 21 | 1      | ○                             | ○    | ○     | ▲                   |                    |
| Q701L/L858R         | 18, 21 | 2      | ○                             | ○    | ○     | △                   | ▲                  |
| E709G/L858R         | 18, 21 | 2      | ●                             | ○    | ○     | ▲                   | ▲                  |
| E709K/L858R         | 18, 21 | 3      | ○                             | ○    | ○     | ▲                   | ▲                  |
| E709V/L858R         | 18, 21 | 1      | ●                             | ○    | ○     | △                   | ▲                  |
| K716Q/G719A/L861Q   | 18, 21 | 1      | ○                             | ○    | ○     | △                   | ▲                  |
| G719C/L861Q         | 18, 21 | 1      | ●                             | ●    | ○     | △                   |                    |
| P743S               | 19     | 1      |                               |      |       |                     | ▲                  |
| I744V/Del E746-A750 | 19     | 1      | ○                             | ○    | ○     | △                   | ▲                  |
| I744_K745>KIPVAI    | 19     | 1      |                               |      |       |                     |                    |
| Del K745_A750       | 19     | 1      |                               |      |       | ▲                   | ▲                  |
| Del E746_A750       | 19     | 164    | ●                             | ●    | ●     | ▲                   | ▲                  |

---

|                        |        |    |   |   |   |   |   |
|------------------------|--------|----|---|---|---|---|---|
| Del E746_A750>VP       | 19     | 1  |   |   |   |   | ▲ |
| E746G/L747P            | 19     | 1  |   |   |   | △ |   |
| Del E746_T751          | 19     | 1  | ● | ● | ● | ▲ | ▲ |
| Del E746_T751>A        | 19     | 6  | ● | ● | ● | ▲ | ▲ |
| Del E746_T751>L        | 19     | 1  |   |   |   |   | ▲ |
| Del E746_T751>V        | 19     | 3  |   |   | ● | ▲ |   |
| Del E746_T751>VA       | 19     | 2  |   |   | ● |   | ▲ |
| Del E746_T751>VP       | 19     | 1  |   |   |   |   | ▲ |
| Del E746_T751/Del P753 | 19     | 1  | ○ | ○ | ○ | △ | ▲ |
| Del E746_S752>V        | 19     | 5  | ● | ● | ● | ▲ | ▲ |
| Del L747_E749          | 19     | 1  | ● | ● | ● | ▲ |   |
| Del L747_E749>C        | 19     | 1  |   |   |   |   |   |
| Del L747_E749/K754E    | 19     | 1  | ○ | ○ | ○ | △ |   |
| Del L747_A750>P        | 19     | 13 | ● | ● | ● | ▲ | ▲ |
| Del L747_T751          | 19     | 19 | ● | ● | ● | ▲ | ▲ |
| Del L747_T751>P        | 19     | 5  | ● | ● | ● | ▲ | ▲ |
| Del L747-T751>PI       | 19     | 1  |   |   |   |   |   |
| Del L747_S752          | 19     | 3  | ● | ● | ● | ▲ | ▲ |
| Del L747_S752>Q        | 19     | 1  |   |   | ● | ▲ | ▲ |
| Del L747_P753>S        | 19     | 14 | ● | ● | ● | ▲ | ▲ |
| Del L747_P753>SK       | 19     | 1  |   |   |   |   |   |
| Del A750_I759>SS       | 19     | 1  |   |   |   |   | ▲ |
| Del T751_I759>N        | 19     | 1  |   |   |   |   | ▲ |
| Del T751_I759>S        | 19     | 1  |   |   |   |   | ▲ |
| Del S752_I759          | 19     | 1  |   |   | ● | ▲ | ▲ |
| Del L747_P753>S/V834L  | 19, 21 | 1  | ○ | ○ | ○ | △ | ▲ |
| L747S/L858R            | 19, 21 | 2  | ○ | ○ | ○ | △ | ▲ |
| D761_E762>EAFQ         | 20     | 1  |   |   |   |   |   |
| M766_A767>PHVC         | 20     | 1  |   |   |   |   |   |
| A767_V769 dup          | 20     | 4  |   |   |   |   | ▲ |
| S768_V769>NPH          | 20     | 1  |   |   |   |   |   |
| S768_D770 dup          | 20     | 1  |   |   |   |   |   |

---

|                   |        |     |   |   |   |   |   |
|-------------------|--------|-----|---|---|---|---|---|
| V769_D770>ASV     | 20     | 1   |   | ● | ● |   |   |
| D770_N771>SVD     | 20     | 3   |   |   |   | ● |   |
| Del D770_N771>PPH | 20     | 1   |   |   |   |   |   |
| H773_V774>H       | 20     | 1   |   | ● | ● |   |   |
| D807N             | 20     | 1   |   |   |   |   |   |
| D761Y/L858R       | 20, 21 | 1   | ○ | ○ | ○ | ▲ |   |
| S768I/L858R       | 20, 21 | 3   | ● | ● | ● | ▲ | ▲ |
| V769A/L858R       | 20, 21 | 1   | ○ | ○ | ○ | △ | ▲ |
| V769M/L858R       | 20, 21 | 1   | ○ | ○ | ○ | △ | ▲ |
| R776H/L858R       | 20, 21 | 2   | ○ | ○ | ○ | ▲ | ▲ |
| T790M/L858R       | 20, 21 | 5   | ● | ● | ● | △ | ▲ |
| L833F/L861R       | 21     | 1   |   |   |   | △ | ▲ |
| L833V/H835L       | 21     | 3   |   |   |   | △ | ▲ |
| L833V/L858R       | 21     | 2   | ○ | ○ | ○ | ▲ | ▲ |
| L858R             | 21     | 251 | ● | ● | ● | ▲ | ▲ |
| L858M/L858R       | 21     | 1   | ○ | ○ | ○ | △ |   |
| L858R/V834L       | 21     | 4   | ○ | ○ | ○ | ▲ | ▲ |
| L858R/V843I       | 21     | 1   | ○ | ○ | ○ | ▲ | ▲ |
| L861Q             | 21     | 15  | ● | ● |   | ▲ | ▲ |
| L861Q/E866Q       | 21     | 1   | ○ | ○ |   | △ | ▲ |
| L861R             | 21     | 1   |   |   |   | ▲ | ▲ |

DC, disease control, MtS, mutant type-specific sensitive methods; EGFR-TKIs, epidermal growth factor receptor-tyrosine kinase inhibitors; MS, matrix-assisted laser desorption ionization-time of flight mass spectrometry; ARMS, Scorpions amplification refractory mutation system.

<sup>a</sup>DIRECT: mutations associated with disease control to EGFR-TKIs by DNA-Mutation Inventory to Refine and Enhance Cancer Treatment (DIRECT) database (Clin Cancer Res 2013; 19:1894-1901).

<sup>b</sup>TH/CH: mutations associated with disease control to EGFR-TKIs by cases with treatment history at Taichung Veterans General Hospital and Chang Gung Memorial Hospital.

\*Detectability: ●Fully detectable; ○Partly detectable.

\*\*Disease control (DC) by EGFR-TKIs: ▲Matched with mutation(s) associated with disease control in DIRECT database or cases with disease control in response to EGFR-TKIs therapy at our facilities; △ Matched with part of mutation(s) associated with disease control in DIRECT database.
